# Supplementary material
Source: PubMed Central journal article supplement (PMC3266790)
Supplement: JCI59526sd.pdf [file JCI59526sd.pdf]

**SUPPLEMENTAL MATERIAL FOR:**

**Complete OATP1B1 and OATP1B3 deficiency causes human Rotor syndrome  
by interrupting conjugated bilirubin reuptake into the liver**

Evita van de Steeg, Viktor Stránecký, Hana Hartmannová, Lenka Nosková, Martin Hřebíček, Els Wagenaar, Anita van Esch, Dirk R. de Waart, Ronald P.J. Oude Elferink, Kathryn E. Kenworthy, Eva Sticová, Mohammad al-Edreesi, A.S. Knisely, Stanislav Kmoch, Milan Jirsa and Alfred H. Schinkel

**Containing:**

- **Supplemental Results**
- **Supplemental Methods**
- **Supplemental Reference**
- **Supplemental Figures 1-3**
- **Supplemental Tables 1-4**

## SUPPLEMENTAL RESULTS

### Search for mutations associated with Rotor syndrome (RS) in the general population

To assess the general population frequency of RS-causing mutations, we searched the Database of Genomic Variants for genomic copy number variations (CNVs) within the *SLCO1B3* and *SLCO1B1* locus in healthy control samples. This yielded two deletions. Variation\_49020, encompassing practically the whole *SLCO1B3* and *SLCO1B1* locus (chr12:20,901,315-21,296,099), was almost identical to the 405 kb deletion present in the R2 haplotype. It was found in 2 of 2026 investigated individuals, as was Variation\_49025, which encompasses the first 2 exons of *SLCO1B1* (chr12:21,163,569-21,196,565), including the first coding exon (reference S1). A parallel search for CNVs in the raw data and genotypes generated on HapMap Phase III samples using Affymetrix SNP 6.0 arrays in 1115 individuals from 11 populations, as well as in another 200 DNA samples previously genotyped in our laboratory using the same technology, yielded 2 deletions and a single amplification: A deletion of chr12:20,909,063-20,921,469 encompassing exon 9 of *SLCO1B3*; a deletion of chr12:20,920,041-20,928,922 encompassing exons 9 and 10 of *SLCO1B3*; and an amplification of chr12:20,840,001-21,534,490 encompassing the whole *SLCO1B3* and *SLCO1B1* locus. In these data we also identified 12 individuals homozygous for extended stretches of the R1 haplotype block and 6 individuals homozygous for extended stretches of the R3 haplotype block. Genotyping of genomic DNA of these individuals obtained from Coriell Cell Repositories, did not find the chr12:g.(20,927,077)\_(20,934,292)del(N<sub>205</sub>)ins mutation in the R1-haplotype samples, nor the c.1747+1G>A *SLCO1B3* mutation or the c.757C>T (p.R253X) *SLCO1B1* mutation in the R3-haplotype samples, suggesting that these mutations are relatively recent events.

We further genotyped 1,004 control samples of Central European ancestry to assess population frequencies of each of the RS deletions. One of the samples contained the heterozygous 405 kb deletion found in the R2 haplotype. Interestingly, the single identified individual having the R1-haplotype-associated c.1738C>T (p.R580X) mutation in *SLCO1B1* (in heterozygous state), was also homozygous for the R1 haplotype-associated deletion in *SLCO1B3*.

**Expression of uptake and efflux transporters in *Slco1a/1b;Abcc2*<sup>-/-</sup>, *Slco1a/1b;Abcc3*<sup>-/-</sup>, and *Slco1a/1b;Abcc2;Abcc3*<sup>-/-</sup> mice**

Quantitative RT-PCR analysis was performed for a range of functionally relevant uptake and efflux transporters in liver, kidney, and intestine of the single and combination knockout strains, as well as UDP-glycuronosyltransferase 1a1 (*Ugt1a1*) in liver (Supplemental Table 1). In the liver, expression of *Abcc2* was somewhat downregulated in *Slco1a/1b*<sup>-/-</sup> and *Slco1a/1b;Abcc3*<sup>-/-</sup> mice (1.6- and 1.8-fold, respectively) and expression of *Abcc3* was somewhat downregulated in *Slco1a/1b*<sup>-/-</sup> mice (1.8-fold). However, these changes in expression were not noticeable on Western blot (data not shown). Hepatic *Abcc3* mRNA was slightly (1.8-fold) upregulated in *Abcc2*<sup>-/-</sup> mice but not significantly different from wild-type in *Slco1a/1b;Abcc2*<sup>-/-</sup> mice. *Ugt1a1* expression was not significantly altered in any of the strains.

## SUPPLEMENTAL METHODS

**Mutation analysis.** Long-range PCR encompassing the genomic regions of the deletion breakpoint boundaries was performed using an Expand Long Range dNTPack (Roche Applied Science). Resulting PCR products were gel-purified and sequenced using a primer walking approach. DNA sequencing of PCR products and genomic fragments covering 1 kb of the promoter regions and all of the exons, with their corresponding exon-intron boundaries, of *SLCO1B1*, *SLCO1B3*, and *SLCO1A2* was performed using a version 3.1 Dye Terminator cycle sequencing kit (Applied Biosystems) and electrophoresis on an ABI 3100 Avant Genetic Analyzer (Applied Biosystems). Data were analyzed using SeqScape software.

**Histology and immunohistochemistry.** Archival liver-biopsy specimens were available from 5 unrelated RS index subjects (probands, Families CE1, CE2, CE3, and P1; brother [A3 II.9] of proband from Family A3). Sections of paraffin-embedded material (formalin or Carnoy-solution fixative; 4-6  $\mu\text{m}$  thick) were routinely stained with hematoxylin/eosin and periodic acid – Schiff techniques. For OATP1B1 and OATP1B3 immunostaining, similar sections, mounted on SuperFrost Plus slides (Dako) were routinely deparaffinized, rinsed in distilled water, and treated in 10 mM sodium citrate buffer, pH 6.0, for 30 min at 96°C. Endogenous peroxidase activity was blocked by 10 min incubation with 1%  $\text{H}_2\text{O}_2$ . After rinsing in distilled water the sections were incubated with primary mouse anti-OATP1B antibody (clone MDQ; recognizing the N-terminus of both OATP1B1 and OATP1B3), 1:100 dilution, overnight at 4°C (31). Bound antibody was visualized with horseradish peroxidase/diaminobenzidine (EnVision), with hematoxylin counterstaining. Adult human livers without cholestasis served as positive controls; for negative

controls, the primary antibody was replaced by buffer. Immunostaining for ABCC2, using primary mouse anti-ABCC2 antibody (clone M2III-6), was performed as described (14).

**Mouse strains and conditions.** All mice were of identical genetic background (>99% FVB) and between 9 and 14 weeks of age. Mice were kept in a temperature-controlled environment with a 12-h light/12-h dark cycle. Mice received a standard diet (AM-II; Hope Farms) and acidified water *ad libitum*.

**Clinical-chemical analysis of mouse plasma.** Blood samples were isolated by cardiac puncture from isoflurane-anesthetized mice. Standard clinical-chemical analyses on EDTA plasma were performed on a Roche Hitachi 917 analyzer to determine levels of total and conjugated bilirubin, alkaline phosphatase, aspartate aminotransaminase, alanine aminotransaminase,  $\gamma$ -glutamyl transferase, lactate dehydrogenase, creatinine, urea,  $\text{Na}^+$ ,  $\text{K}^+$ ,  $\text{Ca}^{2+}$ , total protein, albumin, uric acid, cholesterol, and triglyceride.

**Analysis of bilirubin in mouse plasma, bile and urine.** Gallbladder cannulations and collection of bile in male wild-type, *Abcc2*<sup>-/-</sup>, *Abcc3*<sup>-/-</sup>, *Abcc2;Abcc3*<sup>-/-</sup>, *Slco1a1b*<sup>-/-</sup>, *Slco1a1b;Abcc2*<sup>-/-</sup>, *Slco1a1b;Abcc3*<sup>-/-</sup>, and *Slco1a1b;Abcc2;Abcc3*<sup>-/-</sup> mice (n = 4-7) were performed as described (25, 50, 51). Bile collected in the first 15 min after gall bladder cannulation was analyzed for bilirubin concentrations. We also collected urine (spot-collection beforehand) and heparin plasma (cardiac puncture afterwards) from these mice. For the detection of bilirubin in *Slco1a1b*<sup>-/-</sup>; *1B1*<sup>tg</sup> and *Slco1a1b*<sup>-/-</sup>; *1B3*<sup>tg</sup> mice we isolated heparin plasma by cardiac puncture and urine by spot-collection. Ascorbate (100 mg/ml) was added to all plasma (10  $\mu$ l), urine (10

$\mu\text{l}$ ), and bile samples (2  $\mu\text{l}$ ) in order to prevent oxidation of bilirubin. All samples were immediately protected from the light, snap-frozen, and stored at  $-80^{\circ}\text{C}$  until further analysis. Concentrations of bilirubin monoglucuronides (BMG), bilirubin diglucuronide (BDG), and unconjugated bilirubin (UCB) in plasma, bile, and urine were determined as described (51).

## **SUPPLEMENTAL REFERENCE**

S1. Shaikh TH, et al. High-resolution mapping and analysis of copy number variations in the human genome: a data resource for clinical and research applications. *Genome Res.* 2009;19(9):1682-1690.

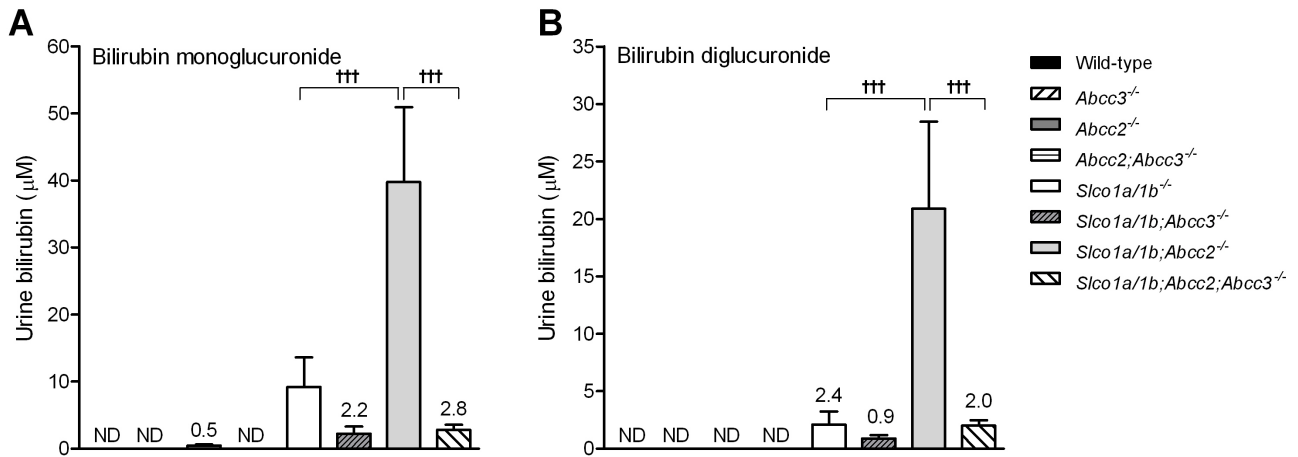

**Supplemental Figure 1. Urinary bilirubin glucuronide levels in *Slco1a/1b*<sup>-/-</sup>, *Slco1a/1b;Abcc3*<sup>-/-</sup>, *Slco1a/1b;Abcc2*<sup>-/-</sup> and *Slco1a/1b;Abcc2;Abcc3*<sup>-/-</sup> mice.** **A**, Bilirubin monoglucuronide and **B**, bilirubin diglucuronide concentrations in urine of male wild-type, *Abcc3*<sup>-/-</sup>, *Abcc2*<sup>-/-</sup>, *Abcc2;Abcc3*<sup>-/-</sup>, *Slco1a/1b*<sup>-/-</sup>, *Slco1a/1b;Abcc3*<sup>-/-</sup>, *Slco1a/1b;Abcc2*<sup>-/-</sup>, and *Slco1a/1b;Abcc2;Abcc3*<sup>-/-</sup> mice. Data are shown as means ± S.D. (n = 4-7). Urine was collected by spot-sampling. Unconjugated bilirubin concentrations were negligible. Bracketed comparisons: <sup>†††</sup>*P* < 0.001. ND, not detectable; detection limit was 0.1 μM. For low bars measured values are presented above the bar.



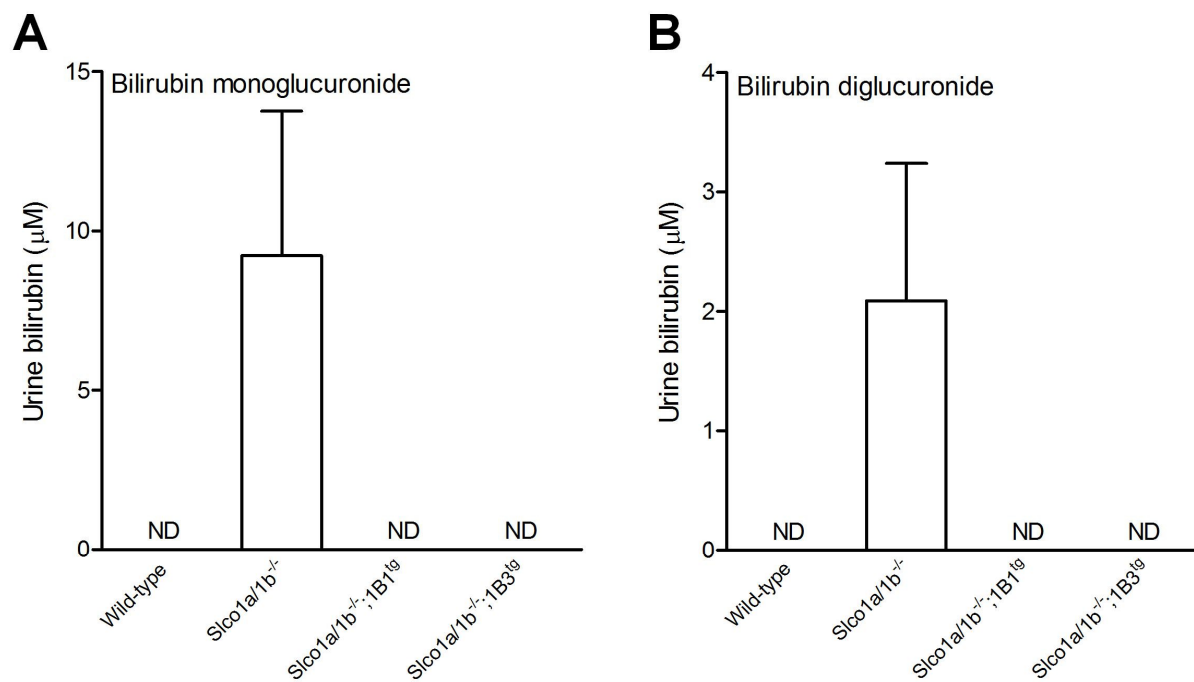

**Supplemental Figure 2. Urinary bilirubin glucuronide levels in *Slco1a1/1b1*<sup>-/-</sup>, *Slco1a1/1b1*<sup>-/-</sup>;1B1<sup>tg</sup>, and *Slco1a1/1b1*<sup>-/-</sup>;1B3<sup>tg</sup> mice.** **A**, Bilirubin monoglucuronide and **B**, bilirubin diglucuronide concentrations in urine of male wild-type, *Slco1a1/1b1*<sup>-/-</sup>, *Slco1a1/1b1*<sup>-/-</sup>;1B1<sup>tg</sup>, and *Slco1a1/1b1*<sup>-/-</sup>;1B3<sup>tg</sup> mice. Data are shown as means ± S.D. (n = 4-7). Urine was collected by spot-sampling. Unconjugated bilirubin concentrations were negligible. ND, not detectable; detection limit was 0.1 µM. For low bars measured values are presented above the bar.

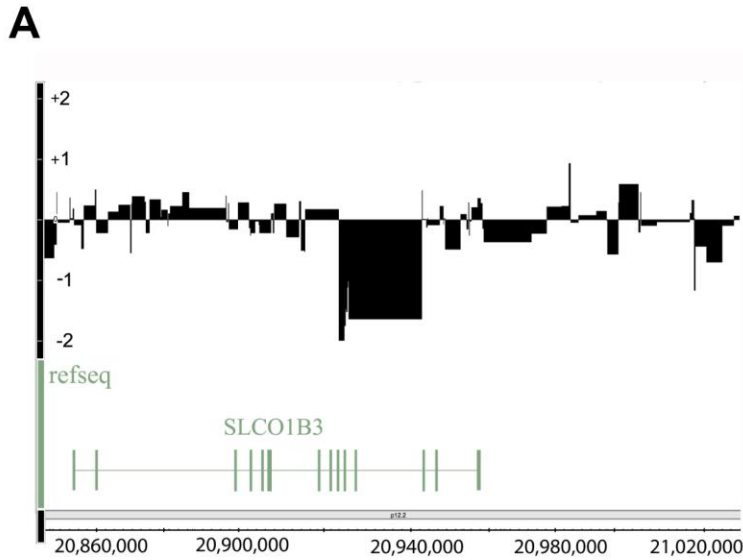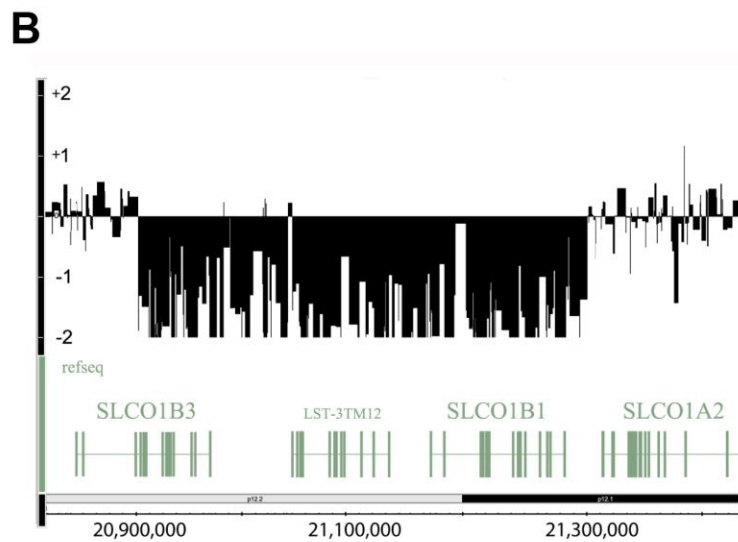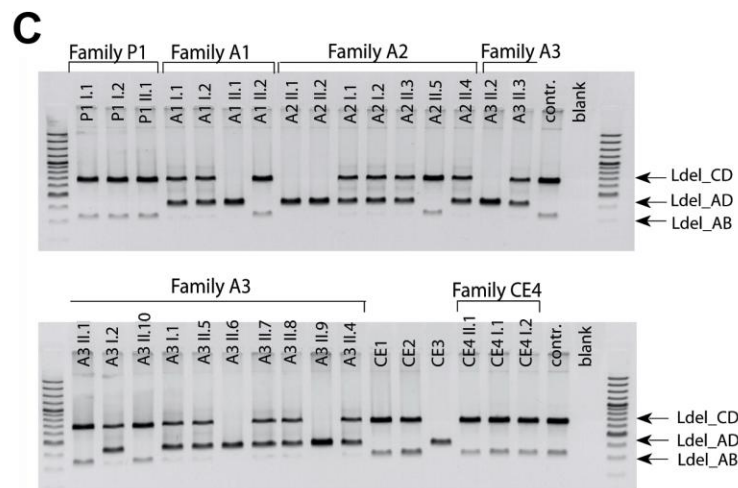

**Supplemental Figure 3. Mapping of deletions in the *SLCO1B* locus (A and B) and PCR-based genotyping of the R2 haplotype-linked deletion in individuals from RS families (C).** Log<sub>2</sub> of fluorescence intensity ratios for microarray probes distributed along the RS candidate locus in approximately 10 kb intervals for haplotypes R1 (A), and R2 (B), respectively. The value 0 indicates the presence of two copies of the genomic sequence complementary to the probe sequence. Regions with a large rectangular drop (A) or with multiple irregular rectangular drops (B) to the baseline noise value -2 indicate loss of two copies due to homozygous deletions in probands CE1 (R1 haplotype) and CE3 (R2 haplotype), respectively. The discrepancy between the results of the microarray-based low resolution mapping and sequencing-based exact mapping of the deletion breakpoints, especially for *SLCO1B3* in proband CE1 (Figure 4), is explained by long physical distances between the variations genotyped with the microarray probes. C, PCR-based genotyping documents segregation of the R2 haplotype-linked deletion in 4 of 8 investigated RS families. Primer pair Ldel\_AD amplifies across the R2 deletion, whereas primer pairs Ldel\_AB and Ldel\_CD amplify from within the R2 deletion area to just outside the R2 deletion area, each covering one of the two deletion junctions. For primer positions see Supplemental Table 4.

**Supplemental Table 1. RT-PCR analysis ( $\Delta$ Ct values) of expression of endogenous uptake and efflux transporters in liver, kidney and small intestine of male wild-type and knockout mice.**

**A. Liver RT-PCR**

|                | Wild-type    | <i>Abcc2</i> <sup>-/-</sup> | <i>Abcc3</i> <sup>-/-</sup> | <i>Abcc2/3</i> <sup>-/-</sup> | <i>Slco1a1/1b</i> <sup>-/-</sup> | <i>Slco1a1/1b</i> ;<br><i>Abcc2</i> <sup>-/-</sup> | <i>Slco1a1/1b</i> ;<br><i>Abcc3</i> <sup>-/-</sup> | <i>Slco1a1/1b</i> ;<br><i>Abcc2/3</i> <sup>-/-</sup> |
|----------------|--------------|-----------------------------|-----------------------------|-------------------------------|----------------------------------|----------------------------------------------------|----------------------------------------------------|------------------------------------------------------|
| <i>Abcc2</i>   | -3.30 ± 0.23 | -                           | -3.04 ± 0.40                | -                             | -2.64 ± 0.05*                    | -                                                  | -2.43 ± 0.28*                                      | -                                                    |
| <i>Abcc3</i>   | 1.82 ± 0.14  | 0.98 ± 0.20*                | -                           | -                             | 2.68 ± 0.06*                     | 2.21 ± 0.63                                        | -                                                  | -                                                    |
| <i>Abcc4</i>   | 8.67 ± 0.35  | 6.42 ± 0.78***              | 8.17 ± 0.46                 | 6.47 ± 0.45***                | 8.78 ± 0.40                      | 9.28 ± 0.90                                        | 8.21 ± 0.49                                        | 7.98 ± 0.13                                          |
| <i>Abcg2</i>   | 0.31 ± 0.26  | 0.31 ± 0.28                 | 0.22 ± 0.41                 | 0.18 ± 0.28                   | 0.35 ± 0.05                      | 0.68 ± 0.26                                        | 0.14 ± 0.39                                        | 0.13 ± 0.45                                          |
| <i>Abcb1a</i>  | 5.19 ± 0.33  | 6.51 ± 0.72                 | 6.63 ± 0.90                 | 7.21 ± 0.34*                  | 6.10 ± 0.86                      | 7.25 ± 0.30*                                       | 6.96 ± 1.28                                        | 7.21 ± 1.28*                                         |
| <i>Abcb1b</i>  | 7.39 ± 0.51  | 7.81 ± 0.77                 | 6.98 ± 1.05                 | 7.50 ± 0.65                   | 7.95 ± 0.05                      | 8.53 ± 0.43                                        | 7.74 ± 0.69                                        | 8.11 ± 0.43                                          |
| <i>Abcb11</i>  | -2.53 ± 0.90 | -2.95 ± 0.21                | -2.84 ± 0.16                | -2.82 ± 0.12                  | -2.76 ± 0.30                     | -2.53 ± 0.39                                       | -2.57 ± 0.03                                       | -3.20 ± 0.16                                         |
| <i>Slco1a1</i> | -2.10 ± 0.15 | -1.66 ± 0.24                | -1.66 ± 0.49                | -1.55 ± 0.29                  | -                                | -                                                  | -                                                  | -                                                    |
| <i>Slco1a4</i> | -0.30 ± 0.39 | 1.13 ± 0.32*                | 0.90 ± 0.65*                | 2.36 ± 0.45**                 | -                                | -                                                  | -                                                  | -                                                    |
| <i>Slco1b2</i> | -4.76 ± 0.16 | -4.33 ± 0.04                | -4.38 ± 0.34                | -4.30 ± 0.11                  | -                                | -                                                  | -                                                  | -                                                    |
| <i>Slco2b1</i> | -1.08 ± 0.18 | -0.84 ± 0.73                | -1.04 ± 0.49                | -0.33 ± 0.32                  | -0.85 ± 0.05                     | -0.57 ± 0.30                                       | -0.60 ± 0.49                                       | -1.00 ± 0.17                                         |
| <i>Slc10a1</i> | -4.36 ± 0.10 | -3.90 ± 0.12                | -3.99 ± 0.28                | -3.86 ± 0.07                  | -4.36 ± 0.13                     | -3.91 ± 0.57                                       | -4.07 ± 0.37                                       | -4.54 ± 0.21                                         |
| <i>Ugt1a1</i>  | 2.28 ± 0.16  | 2.07 ± 0.14                 | 1.81 ± 0.45                 | 2.34 ± 0.23                   | 2.06 ± 1.18                      | 1.74 ± 0.24                                        | 1.87 ± 0.22                                        | 2.39 ± 0.04                                          |

**B. Kidney RT-PCR**

|                | Wild-type    | <i>Abcc2</i> <sup>-/-</sup> | <i>Abcc3</i> <sup>-/-</sup> | <i>Abcc2/3</i> <sup>-/-</sup> | <i>Slco1a1/1b</i> <sup>-/-</sup> | <i>Slco1a1/1b</i> ;<br><i>Abcc2</i> <sup>-/-</sup> | <i>Slco1a1/1b</i> ;<br><i>Abcc3</i> <sup>-/-</sup> | <i>Slco1a1/1b</i> ;<br><i>Abcc2/3</i> <sup>-/-</sup> |
|----------------|--------------|-----------------------------|-----------------------------|-------------------------------|----------------------------------|----------------------------------------------------|----------------------------------------------------|------------------------------------------------------|
| <i>Abcc2</i>   | -1.74 ± 0.33 | -                           | -1.70 ± 0.14                | -                             | -1.48 ± 0.31                     | -                                                  | -1.58 ± 0.06                                       | -                                                    |
| <i>Abcc3</i>   | 10.1 ± 1.43  | 10.7 ± 1.55                 | -                           | -                             | 10.2 ± 2.69                      | 8.63 ± 0.43                                        | -                                                  | -                                                    |
| <i>Abcc4</i>   | 3.14 ± 0.13  | 2.18 ± 0.10**               | 4.13 ± 0.17**               | 3.12 ± 0.40                   | 3.65 ± 0.21                      | 2.52 ± 0.25*                                       | 4.26 ± 0.09***                                     | 2.59 ± 0.41                                          |
| <i>Abcg2</i>   | -1.37 ± 0.12 | -0.91 ± 0.15                | -0.93 ± 0.16                | -1.26 ± 0.55                  | -1.07 ± 0.28                     | -0.98 ± 0.14                                       | -0.83 ± 0.16                                       | -1.18 ± 0.12                                         |
| <i>Abcb1a</i>  | 4.69 ± 0.20  | 4.93 ± 0.09                 | 5.95 ± 0.37**               | 5.51 ± 0.52                   | 5.63 ± 0.69                      | 4.83 ± 0.18                                        | 5.64 ± 0.36                                        | 4.78 ± 0.44                                          |
| <i>Abcb1b</i>  | 4.76 ± 0.09  | 4.83 ± 0.36                 | 4.41 ± 0.18                 | 4.60 ± 0.47                   | 4.20 ± 0.17                      | 4.89 ± 0.45                                        | 4.76 ± 0.74                                        | 4.33 ± 0.41                                          |
| <i>Slco1a1</i> | -1.04 ± 0.15 | -0.71 ± 0.16                | -0.75 ± 0.14                | -1.35 ± 0.14                  | -                                | -                                                  | -                                                  | -                                                    |
| <i>Slco1a6</i> | -3.04 ± 0.21 | -2.86 ± 0.14                | -2.87 ± 0.34                | -3.09 ± 0.43                  | -                                | -                                                  | -                                                  | -                                                    |
| <i>Slco2b1</i> | 2.68 ± 0.08  | 2.91 ± 0.46                 | 2.42 ± 0.13                 | 2.55 ± 0.67                   | 2.64 ± 0.11                      | 2.99 ± 0.05                                        | 2.82 ± 0.18                                        | 2.54 ± 0.29                                          |

### C. Small intestine RT-PCR

|                | Wild-type   | <i>Abcc2</i> <sup>-/-</sup> | <i>Abcc3</i> <sup>-/-</sup> | <i>Abcc2/3</i> <sup>-/-</sup> | <i>Slco1a1/1b</i> <sup>-/-</sup> | <i>Slco1a1/1b</i> ;<br><i>Abcc2</i> <sup>-/-</sup> | <i>Slco1a1/1b</i> ;<br><i>Abcc3</i> <sup>-/-</sup> | <i>Slco1a1/1b</i> ;<br><i>Abcc2/3</i> <sup>-/-</sup> |
|----------------|-------------|-----------------------------|-----------------------------|-------------------------------|----------------------------------|----------------------------------------------------|----------------------------------------------------|------------------------------------------------------|
| <i>Abcc2</i>   | 0.21 ± 0.32 | -                           | 0.17 ± 0.75                 | -                             | 0.55 ± 0.53                      | -                                                  | 0.62 ± 0.45                                        | -                                                    |
| <i>Abcc3</i>   | 4.85 ± 0.88 | 4.44 ± 0.93                 | -                           | -                             | 5.24 ± 0.65                      | 6.14 ± 0.41                                        | -                                                  | -                                                    |
| <i>Abcc4</i>   | 10.2 ± 0.33 | 10.2 ± 0.51                 | 9.87 ± 0.32                 | 10.2 ± 0.02                   | 10.6 ± 0.62                      | 10.2 ± 1.06                                        | 9.64 ± 0.87                                        | 9.65 ± 0.80                                          |
| <i>Abcg2</i>   | 3.36 ± 1.02 | 2.52 ± 1.34                 | 3.24 ± 0.67                 | 3.57 ± 0.30                   | 3.11 ± 0.68                      | 4.28 ± 0.82                                        | 3.06 ± 0.65                                        | 3.25 ± 0.30                                          |
| <i>Abcb1a</i>  | 1.04 ± 0.26 | 2.37 ± 0.57*                | 1.90 ± 0.94                 | 0.64 ± 0.35                   | 2.32 ± 0.22*                     | 2.29 ± 0.11*                                       | 2.09 ± 0.87                                        | 1.36 ± 0.06                                          |
| <i>Abcb1b</i>  | 9.71 ± 0.60 | 9.15 ± 1.26                 | 10.7 ± 0.84                 | 9.66 ± 0.31                   | 10.5 ± 0.72                      | 10.7 ± 6.20                                        | 9.68 ± 1.69                                        | 10.1 ± 0.13                                          |
| <i>Slco1a4</i> | 5.18 ± 1.40 | 3.90 ± 1.43                 | 3.96 ± 0.76                 | 4.72 ± 0.91                   | -                                | -                                                  | -                                                  | -                                                    |
| <i>Slco2b1</i> | 3.82 ± 0.45 | 4.37 ± 1.19                 | 4.13 ± 0.20                 | 3.99 ± 0.17                   | 4.37 ± 0.19                      | 4.55 ± 0.60                                        | 3.64 ± 0.38                                        | 3.60 ± 0.32                                          |
| <i>Slc10a2</i> | 11.3 ± 0.80 | 10.7 ± 0.61                 | 10.3 ± 0.36                 | 11.1 ± 0.22                   | 12.5 ± 1.65                      | 11.8 ± 1.60                                        | 11.0 ± 0.90                                        | 10.2 ± 0.59                                          |
| <i>Osta</i>    | 1.52 ± 0.29 | 1.26 ± 0.66                 | 1.59 ± 0.23                 | 1.57 ± 0.58                   | 1.30 ± 0.23                      | 1.53 ± 0.18                                        | 1.06 ± 0.55                                        | 1.61 ± 0.63                                          |
| <i>Ostβ</i>    | 0.82 ± 0.18 | 0.63 ± 0.40                 | 1.10 ± 0.46                 | 0.75 ± 0.24                   | 0.79 ± 0.22                      | 0.66 ± 0.42                                        | 0.36 ± 0.77                                        | 0.14 ± 1.01                                          |

Analysis of the results was done by comparative Ct method. Quantification of the target cDNAs in all samples was normalized against the endogenous control  $\beta$ -actin ( $Ct_{\text{target}} - Ct_{\beta\text{-actin}} = \Delta Ct$ ). Accordingly, the lower the value, the higher the expression level. Data are presented as means  $\pm$  S.D. (n = 3); each sample was assayed in duplicate. \* $P < 0.05$ ; \*\* $P < 0.01$ ; \*\*\* $P < 0.001$  when compared with wild-type mice. One-way ANOVA followed by Tukey's multiple comparison test was used to determine statistical significance.

**Supplemental Table 2. Laboratory findings in RS index subjects.**

| RS index subject    | Total bilirubin (μM) | Direct bilirubin (%) | Urinary porphyrin output | Coproporphyrin I (% of total coproporphyrin) | Liver uptake of anionic tracers* | Liver on light microscopy | Liver on electron microscopy |
|---------------------|----------------------|----------------------|--------------------------|----------------------------------------------|----------------------------------|---------------------------|------------------------------|
| Reference           | <17 μM               | <20%                 | <200 μg/24 h             | <40%                                         | high                             | normal                    | normal                       |
| <b>CE1</b> (m)      | 170                  | 70                   | 80 – 500                 | 57                                           | low                              | normal***                 | n.d.                         |
| <b>CE2</b> (m)      | 41 - 121             | 53 - 72              | n.d.                     | n.d.                                         | low                              | normal***                 | n.d.                         |
| <b>CE3</b> (f)      | 60 - 90              | 33                   | n.d.                     | n.d.                                         | n.d.                             | normal***                 | n.d.                         |
| <b>CE4 II.1</b> (f) | 45 - 60              | 50 - 60              | 124                      | n.d.                                         | low                              | n.d.                      | n.d.                         |
| <b>P1 II.1</b> (m)  | 97                   | 77                   | n.d.                     | 62                                           | low                              | normal***                 | normal                       |
| <b>A1 II.1</b> (f)  | 102                  | 57                   | 206                      | 195 μg/24 h**                                | low                              | n.d.                      | n.d.                         |
| <b>A2 II.1</b> (m)  | 53                   | 68                   | n.d.                     | n.d.                                         | n.d.                             | n.d.                      | n.d.                         |
| <b>A2 II.2</b> (m)  | 68                   | 75                   | <25                      | 21 μg/24 h**                                 | low                              | n.d.                      | n.d.                         |
| <b>A3 II.2</b> (m)  | 49                   | 66                   | n.d.                     | n.d.                                         | low                              | n.d.                      | n.d.                         |
| <b>A3 II.6</b> (m)  | 34                   | 60                   | n.d.                     | n.d.                                         | n.d.                             | n.d.                      | n.d.                         |
| <b>A3 II.9</b> (m)  | 53                   | 68                   | n.d.                     | n.d.                                         | low                              | normal***                 | normal                       |

**Boldfaced** – probands. m, male; f, female; n.d., not done.

\*) Bromosulfophthalein (used only in RS subject CE2) or radiotracer.

\*\*) Total coproporphyrin output, isomers were not fractionated.

\*\*\*) Immunostaining for ABCC2 was unremarkable in all 5 tested RS subjects. Moreover, no predictably pathogenic ABCC2 mutations have been found in any of the 8 probands.

**Supplemental Table 3. Single nucleotide variations in exons and splice sites of *SLCO1B* genes detected in RS index subjects, their parents and selected siblings.**

| Subject<br>(family identifier,<br>generation number,<br>subject number,<br>family status) |                | <i>SLCO1B1</i>                               |                                               |                                               |                                |                                              |                                              |                                              |                                                    |                                                                           |
|-------------------------------------------------------------------------------------------|----------------|----------------------------------------------|-----------------------------------------------|-----------------------------------------------|--------------------------------|----------------------------------------------|----------------------------------------------|----------------------------------------------|----------------------------------------------------|---------------------------------------------------------------------------|
|                                                                                           |                | rs2306283<br>c.388A>G<br>(p.N130D)<br>Exon 5 | rs11045818<br>c.411G>A<br>(p.S137S)<br>Exon 5 | rs11045819<br>c.463C>A<br>(p.P155T)<br>Exon 5 | <b>c.481+1G&gt;T</b><br>Exon 5 | rs4149056<br>c.521T>C<br>(p.A174V)<br>Exon 6 | rs4149057<br>c.571T>C<br>(p.L191L)<br>Exon 6 | rs2291075<br>c.597C>T<br>(p.F199F)<br>Exon 6 | <b>c.757C&gt;T</b><br>( <b>p.R253X</b> )<br>Exon 8 | <b>rs71581941</b><br><b>c.1738C&gt;T</b><br>( <b>p.R580X</b> )<br>Exon 13 |
| <b>CE1</b>                                                                                | <b>Proband</b> | GG                                           | GG                                            | CC                                            | GG                             | CC                                           | TT                                           | TT                                           | CC                                                 | TT                                                                        |
| <b>CE2</b>                                                                                | <b>Proband</b> | GG                                           | GG                                            | CC                                            | GG                             | CC                                           | TT                                           | TT                                           | CC                                                 | TT                                                                        |
| <b>CE3</b>                                                                                | <b>Proband</b> | na                                           | na                                            | na                                            | na                             | na                                           | na                                           | na                                           | na                                                 | na                                                                        |
| CE4 I.1                                                                                   | Father         | AG                                           | GG                                            | CC                                            | GG                             | TC                                           | TC                                           | CT                                           | CC                                                 | CT                                                                        |
| CE4 I.2                                                                                   | Mother         | AG                                           | GG                                            | CC                                            | GG                             | TC                                           | TC                                           | CT                                           | CC                                                 | CT                                                                        |
| <b>CE4 II.1</b>                                                                           | <b>Proband</b> | GG                                           | GG                                            | CC                                            | GG                             | CC                                           | TT                                           | TT                                           | CC                                                 | TT                                                                        |
| P1 I.1                                                                                    | Father         | GG                                           | GG                                            | CC                                            | GG                             | TT                                           | TT                                           | CT                                           | CT                                                 | CC                                                                        |
| P1 I.2                                                                                    | Mother         | GG                                           | GG                                            | CC                                            | GG                             | TT                                           | TT                                           | CT                                           | CT                                                 | CC                                                                        |
| <b>P1 II.1</b>                                                                            | <b>Proband</b> | GG                                           | GG                                            | CC                                            | GG                             | TT                                           | TT                                           | TT                                           | TT                                                 | CC                                                                        |
| A1 I.1                                                                                    | Father         | A-                                           | G-                                            | C-                                            | G-                             | C-                                           | C-                                           | C-                                           | C-                                                 | C-                                                                        |
| A1 I.2                                                                                    | Mother         | A-                                           | G-                                            | C-                                            | G-                             | C-                                           | C-                                           | C-                                           | C-                                                 | C-                                                                        |
| <b>A1 II.1</b>                                                                            | <b>Proband</b> | na                                           | na                                            | na                                            | na                             | na                                           | na                                           | na                                           | na                                                 | na                                                                        |
| A1 II.2                                                                                   | Brother        | AA                                           | GG                                            | CC                                            | GG                             | CC                                           | CC                                           | CC                                           | CC                                                 | CC                                                                        |
| A2 I.1                                                                                    | Father         | A-                                           | G-                                            | C-                                            | G-                             | T-                                           | C-                                           | C-                                           | C-                                                 | C-                                                                        |
| A2 I.2                                                                                    | Mother         | A-                                           | G-                                            | C-                                            | T-                             | T-                                           | T-                                           | C-                                           | C-                                                 | C-                                                                        |
| <b>A2 II.1</b>                                                                            | <b>Brother</b> | na                                           | na                                            | na                                            | na                             | na                                           | na                                           | na                                           | na                                                 | na                                                                        |
| <b>A2 II.2</b>                                                                            | <b>Proband</b> | na                                           | na                                            | na                                            | na                             | na                                           | na                                           | na                                           | na                                                 | na                                                                        |
| A2 II.3                                                                                   | Sister         | A-                                           | G-                                            | C-                                            | T-                             | T-                                           | T-                                           | C-                                           | C-                                                 | C-                                                                        |
| A2 II.4                                                                                   | Sister         | A-                                           | G-                                            | C-                                            | G-                             | T-                                           | C-                                           | C-                                           | C-                                                 | C-                                                                        |
| A2 II.5                                                                                   | Brother        | AA                                           | GG                                            | CC                                            | GT                             | TT                                           | TC                                           | CC                                           | CC                                                 | CC                                                                        |
| A3 I.1                                                                                    | Father         | G-                                           | A-                                            | A-                                            | G-                             | T-                                           | C-                                           | T-                                           | C-                                                 | C-                                                                        |
| A3 I.2                                                                                    | Mother         | G-                                           | G-                                            | C-                                            | G-                             | T-                                           | T-                                           | T-                                           | C-                                                 | C-                                                                        |
| <b>A3 II.2</b>                                                                            | <b>Proband</b> | na                                           | na                                            | na                                            | na                             | na                                           | na                                           | na                                           | na                                                 | na                                                                        |
| <b>A3 II.6</b>                                                                            | <b>Brother</b> | na                                           | na                                            | na                                            | na                             | na                                           | na                                           | na                                           | na                                                 | na                                                                        |
| <b>A3 II.9</b>                                                                            | <b>Brother</b> | na                                           | na                                            | na                                            | na                             | na                                           | na                                           | na                                           | na                                                 | na                                                                        |
| A3 II.10                                                                                  | Brother        | GG                                           | GA                                            | CA                                            | GG                             | TT                                           | TC                                           | TT                                           | CC                                                 | CC                                                                        |

| Subject<br>(family identifier,<br>generation number,<br>subject number,<br>family status) |                | SLCO1B3                                      |                                   |                                              |                                               |                                                |                                  |                                                |
|-------------------------------------------------------------------------------------------|----------------|----------------------------------------------|-----------------------------------|----------------------------------------------|-----------------------------------------------|------------------------------------------------|----------------------------------|------------------------------------------------|
|                                                                                           |                | rs4149117<br>c.334T>G<br>(p.S112A)<br>Exon 4 | rs3764009<br>c.360-3C>T<br>Exon 5 | rs7311358<br>c.699G>A<br>(p.M233I)<br>Exon 7 | rs60140950<br>c.767G>C<br>(p.G256A)<br>Exon 8 | rs2053098<br>c.1557A>G<br>(p.A519A)<br>Exon 12 | <b>c.1747+1G&gt;A</b><br>Exon 13 | rs3764006<br>c.1833A>G<br>(p.G611G)<br>Exon 14 |
| <b>CE1</b>                                                                                | <b>Proband</b> | GG                                           | TT                                | AA                                           | GG                                            | na                                             | GG                               | AA                                             |
| <b>CE2</b>                                                                                | <b>Proband</b> | GG                                           | TT                                | AA                                           | GG                                            | na                                             | GG                               | AA                                             |
| <b>CE3</b>                                                                                | <b>Proband</b> | na                                           | na                                | na                                           | na                                            | na                                             | na                               | na                                             |
| CE4 I.1                                                                                   | Father         | GG                                           | TT                                | AA                                           | GG                                            | G-                                             | GG                               | AA                                             |
| CE4 I.2                                                                                   | Mother         | GG                                           | TT                                | AA                                           | GG                                            | G-                                             | GG                               | AA                                             |
| <b>CE4 II.1</b>                                                                           | <b>Proband</b> | GG                                           | TT                                | AA                                           | GG                                            | na                                             | GG                               | AA                                             |
| P1 I.1                                                                                    | Father         | TG                                           | CT                                | GA                                           | GG                                            | AG                                             | GA                               | AA                                             |
| P1 I.2                                                                                    | Mother         | TG                                           | CC                                | GA                                           | GG                                            | AG                                             | GA                               | AA                                             |
| <b>P1 II.1</b>                                                                            | <b>Proband</b> | TT                                           | CC                                | GG                                           | GG                                            | AA                                             | AA                               | AA                                             |
| A1 I.1                                                                                    | Father         | G-                                           | T-                                | A-                                           | C-                                            | G-                                             | G-                               | AA                                             |
| A1 I.2                                                                                    | Mother         | G-                                           | T-                                | A-                                           | G-                                            | G-                                             | G-                               | AA                                             |
| <b>A1 II.1</b>                                                                            | <b>Proband</b> | na                                           | na                                | na                                           | na                                            | na                                             | na                               | na                                             |
| A1 II.2                                                                                   | Brother        | GG                                           | TT                                | AA                                           | GC                                            | GG                                             | GG                               | AA                                             |
| A2 I.1                                                                                    | Father         | G-                                           | T-                                | A-                                           | G-                                            | G-                                             | G-                               | A-                                             |
| A2 I.2                                                                                    | Mother         | T-                                           | C-                                | G-                                           | G-                                            | A-                                             | G-                               | A-                                             |
| <b>A2 II.1</b>                                                                            | <b>Brother</b> | na                                           | na                                | na                                           | na                                            | na                                             | na                               | na                                             |
| <b>A2 II.2</b>                                                                            | <b>Proband</b> | na                                           | na                                | na                                           | na                                            | na                                             | na                               | na                                             |
| A2 II.3                                                                                   | Sister         | T-                                           | C-                                | G-                                           | G-                                            | A-                                             | G-                               | A-                                             |
| A2 II.4                                                                                   | Sister         | G-                                           | T-                                | A-                                           | G-                                            | G-                                             | G-                               | A-                                             |
| A2 II.5                                                                                   | Brother        | TG                                           | CT                                | GA                                           | GG                                            | GA                                             | GG                               | AA                                             |
| A3 I.1                                                                                    | Father         | G-                                           | T-                                | A-                                           | G-                                            | G-                                             | G-                               | A-                                             |
| A3 I.2                                                                                    | Mother         | G-                                           | T-                                | A-                                           | G-                                            | G-                                             | G-                               | G-                                             |
| <b>A3 II.2</b>                                                                            | <b>Proband</b> | na                                           | na                                | na                                           | na                                            | na                                             | na                               | na                                             |
| <b>A3 II.6</b>                                                                            | <b>Brother</b> | na                                           | na                                | na                                           | na                                            | na                                             | na                               | na                                             |
| <b>A3 II.9</b>                                                                            | <b>Brother</b> | na                                           | na                                | na                                           | na                                            | na                                             | na                               | na                                             |
| A3 II.10                                                                                  | Brother        | GG                                           | TT                                | AA                                           | GC                                            | GG                                             | GG                               | AG                                             |

Predictably pathogenic mutations and RS index subjects are in **bold**, **na** – no amplification.

**Supplemental Table 4. Primers used for PCR amplification, sequencing, copy number analysis and mapping of the found deletions.**

| Name                                                  | Primer sequence 5´- 3´         | Genomic position (NCBI36/hg18) | Amplified region |
|-------------------------------------------------------|--------------------------------|--------------------------------|------------------|
| <b>SLCO1A2: PCR &amp; sequencing from genomic DNA</b> |                                |                                |                  |
| SLCO1A2_A1                                            | TCAACACCTGGGAGTGGGTGGT         | 12:21438995-21439016           | Exon 1           |
| SLCO1A2_S1                                            | CAGCTGCGTGCTGGGAGACC           | 12:21439850-21439869           |                  |
| SLCO1A2_A2                                            | ACTTTTCAGTAGGTAGCATGTATGTCAGG  | 12:21418296-21418323           | Exon 2           |
| SLCO1A2_S2                                            | ACAGTCAGTTCTGAGAAGAACACCC      | 12:21418796-21418820           |                  |
| SLCO1A2_A3                                            | TCCTGTGTAGACACACCCTCAGT        | 12:21378607-21378629           | Exon 3           |
| SLCO1A2_S3                                            | TGAAAAGCTTTCTTTTAACCATGTGACCA  | 12:21379178-21379206           |                  |
| SLCO1A2_A4                                            | CGGTTCAGATTAAATGACCTAAAACAGCA  | 12:21362876-21362903           | Exon 4           |
| SLCO1A2_S4                                            | AGGCATTTTGTCAACAGACGGCA        | 12:21363178-21363200           |                  |
| SLCO1A2_A5                                            | AGTGAGGCAGCCAAGAGCACCA         | 12:21358579-21358600           | Exon 5           |
| SLCO1A2_S5                                            | TGCAACCCTAGCACAAATCCAAGT       | 12:21358994-21359017           |                  |
| SLCO1A2_A6                                            | GCACCCGGCCCTTTGACTCATT         | 12:21350818-21350839           | Exon 6           |
| SLCO1A2_S6                                            | TGCACATTGCCACATTGTCTCTCA       | 12:21351232-21351255           |                  |
| SLCO1A2_A7                                            | AGGGTCACCTCCAGGGGCACTA         | 12:21348381-21348402           | Exon 7           |
| SLCO1A2_S7                                            | TGCACTAGGGGTGCCCTGAGAA         | 12:21348917-21348938           |                  |
| SLCO1A2_A8                                            | CAAATTGAAGGTCAAGTAAGGCCATGA    | 12:21345274-21345300           | Exon 8           |
| SLCO1A2_S8                                            | ACCTGTGACCAGCATGAAAGGGA        | 12:21345696-21345719           |                  |
| SLCO1A2_A9                                            | TCTTGACTGGTGACTGTTGATGACA      | 12:21344418-21344442           | Exon 9           |
| SLCO1A2_S9                                            | GCCAAATTTTATAGTTGGTTGGGACCCG   | 12:21344854-21344880           |                  |
| SLCO1A2_A10                                           | ACACCCGCCATCACACTGTTTCG        | 12:21341539-21341560           | Exon 10          |
| SLCO1A2_S10                                           | AGCCAGTCACAAAATGCAAAGCCA       | 12:21341806-21341829           |                  |
| SLCO1A2_A11                                           | TGATCTGATCGTGCATTGCCATTGT      | 12:21339713-21339737           | Exon 11          |
| SLCO1A2_S11                                           | CCCTGTGGGTAATGTGTAACATAAGTGGGG | 12:21340130-21340158           |                  |
| SLCO1A2_A12                                           | AGGCCAGTTCATAGTTGGGAAGT        | 12:21338079-21338102           | Exon 12          |
| SLCO1A2_S12                                           | TGGCTATGTGGTCATCAAAGCAGGT      | 12:21338479-21338503           |                  |
| SLCO1A2_A13                                           | AGTCTGAGTGACTTTCTTAGAACCAAGC   | 12:21336285-21336312           | Exon 13          |
| SLCO1A2_S13                                           | TCCATCTTGATCCAACCTGGCTGTG      | 12:21336604-21336627           |                  |
| SLCO1A2_A14                                           | TGCAGCACACCAACATGGCACA         | 12:21319419-21319440           | Exon 14          |
| SLCO1A2_S14                                           | GGGCTCCTGTGTAGGCTGCCA          | 12:21319783-21319803           |                  |
| SLCO1A2_A15                                           | TGGTGCTGCGTTATGCACAGTCT        | 12:21318608-21318630           | Exon 15          |
| SLCO1A2_S15                                           | ACTTGAAAAGGCCCTGTCTGACCT       | 12:21319148-21319171           |                  |
| SLCO1A2_A16                                           | GGGGCTGTTATTGATGTCCCTCC        | 12:21313537-21313560           | Exon 16          |
| SLCO1A2_S16                                           | AGATCAGCATGCAAAACCATCAGC       | 12:21314067-21314090           |                  |
| <b>SLCO1B1: PCR &amp; sequencing from genomic DNA</b> |                                |                                |                  |
| SLCO1B1P1A1                                           | AGCGTGTGGAAGACACAGAGCA         | 12:21175537-21175558           | Exon 1           |
| SLCO1B1P1S1                                           | AGGTGGTTAATCATCACTGGACTTGT     | 12:21175339-21175364           |                  |
| SLCO1B1P2A1                                           | TTGCTTTTCTATACATTAAAGTTCC      | 12:21185902-21185926           | Exon 2           |
| SLCO1B1P2S1                                           | ATTGACCTAGCAGAGTGGTAACG        | 12:21185567-21185589           |                  |
| SLCO1B1P3A1                                           | TAAATTTACCCAGTTGATAACC         | 12:21217061-21217083           | Exon 3           |
| SLCO1B1P3S1                                           | CATGTGCCTATTGACATTATATAGTCC    | 12:21216782-21216808           |                  |



|              |                                |                      |         |
|--------------|--------------------------------|----------------------|---------|
| SLCO1B1P4A1  | ACAAGGTACTGATAGTGGCACAGAG      | 12:21218935-21218959 | Exon 4  |
| SLCO1B1P4S1  | ACGCATGAAGGAGCACCTTACCCT       | 12:21218456-21218479 |         |
| SLCO1B1P5A1  | TGCAGTTGGCCCTGTTCATCCA         | 12:21221369-21221391 | Exon 5  |
| SLCO1B1P5S1  | TAACCCACTTAGCCTGGGGTGT         | 12:21220748-21220769 |         |
| SLCO1B1P6A1  | ACAGAGATCCCAGGGTAAAGCCA        | 12:21223160-21223182 | Exon 6  |
| SLCO1B1P6S1  | CAGCATAAGAATGGACTAATACACC      | 12:21222600-21222624 |         |
| SLCO1B1P7A1  | TGCTTAGAAAAGACGTTATCATGG       | 12:21223245-21223267 | Exon 7  |
| SLCO1B1P7S1  | CATGGTGAATAAGAACCATGC          | 12:21223062-21223082 |         |
| SLCO1B1P8A1  | AGTGCAAAAAGAAAGCCAACCTCCA      | 12:21241485-21241507 | Exon 8  |
| SLCO1B1P8S1  | ACTTCTTCATACCATTTATTTCCCTGAACC | 12:21241066-21241095 |         |
| SLCO1B1P9A1  | CAAAATCACTTTCACAATAAAATACC     | 12:21244938-21244963 | Exon 9  |
| SLCO1B1P9S1  | GCCTGTGGTATTGCAGGCTATTCTC      | 12:21244563-21244587 |         |
| SLCO1B1P10A1 | TGATCCATCCAAGATTACAGTGGTGGT    | 12:21247266-21247292 | Exon 10 |
| SLCO1B1P10S1 | ACCGGGGACTGTTGAGGGGT           | 12:21246396-21246415 |         |
| SLCO1B1P11A1 | TGTGCTTTTGAATAAGGAGAGG         | 12:21250256-21250277 | Exon 11 |
| SLCO1B1P11S1 | TCTCTGCTTTCACCTTACTTCTTCC      | 12:21249974-21249998 |         |
| SLCO1B1P12A1 | TCATTAGGTGTGTTTATAGTCTCATGC    | 12:21261536-21261562 | Exon 12 |
| SLCO1B1P12S1 | AATGTATTTGCAGCACTGTTAGG        | 12:21261254-21261276 |         |
| SLCO1B1P13A1 | TTAACAATCGAATTCTCCTTAGG        | 12:21266789-21266812 | Exon 13 |
| SLCO1B1P13S1 | GGAGAAGGTTAATGTTGTTTCG         | 12:21266427-21266449 |         |
| SLCO1B1P14A1 | GAGATACGAGATTGCTTGATACC        | 12:21269173-21269195 | Exon 14 |
| SLCO1B1P14S1 | CATGCAGTTACATTTAAATATGTTCC     | 12:21268864-21268890 |         |
| SLCO1B1P15A1 | CAAAGTCAATTTTCCCTAATACATTACC   | 12:21284053-21284080 | Exon 15 |
| SLCO1B1P15S1 | TTTTTCTTTAGGATCTGGATACTGG      | 12:21283087-21283111 |         |

**SLCO1B3: PCR & sequencing from genomic DNA**

|              |                                |                      |         |
|--------------|--------------------------------|----------------------|---------|
| SLCO1B3P1A1  | AGGGCTCAGAACAAAAGTGTGGAGA      | 12:20855086-20855110 | Exon 1  |
| SLCO1B3P1S1  | GGCTTCTGGGGTGAACCTCTAGAATTA    | 12:20854770-20854796 |         |
| SLCO1B3P2A1  | TGTTCTTTTTGACAGTTAGTGGCCTTCT   | 12:20860081-20860109 | Exon 2  |
| SLCO1B3P2S1  | CCTGTGGTCAGGAAATAGCAGGCC       | 12:20859738-20859762 |         |
| SLCO1B3P3A1  | TGTTTTTCAACTTATGCAAGTATGG      | 12:20899398-20899422 | Exon 3  |
| SLCO1B3P3S1  | AAACTGTTTTAGTTCATGTACC         | 12:20899146-20899168 |         |
| SLCO1B3P4A1  | GCAGCAGGTGAAGTTGTGAAGCC        | 12:20903107-20903129 | Exon 4  |
| SLCO1B3P4S1  | AGGGAAGGTACAATGTCTTGGGCA       | 12:20902532-20902555 |         |
| SLCO1B3P5A1  | TGTGTGTTTAAGAATCGACTGC         | 12:20905493-20905515 | Exon 5  |
| SLCO1B3P5S1  | TCTGGTAATTTGGAGAAGACAGC        | 12:20905100-20905122 |         |
| SLCO1B3P6A1  | TGACATTATTATTTCAAGGGTAGATCC    | 12:20906801-20906827 | Exon 6  |
| SLCO1B3P6S1  | TGAATATGAATCACTTGTAATTAGG      | 12:20906482-20906506 |         |
| SLCO1B3P7A1  | TTCTTTGGAAGAATGGTGTCC          | 12:20907103-20907123 | Exon 7  |
| SLCO1B3P7S1  | TGATTACATTCCTGGATCTACC         | 12:20906787-20906809 |         |
| SLCO1B3P8A1  | AGCAGAAACCTAATCCTCTTCCCCT      | 12:20919862-20919886 | Exon 8  |
| SLCO1B3P8S1  | GGTTTACTTTCTTCATCTATGGAGGACTGC | 12:20919328-20919357 |         |
| SLCO1B3P9A1  | CAGCAGTGTTCATTATCAAGC          | 12:20922162-20922184 | Exon 9  |
| SLCO1B3P9S1  | CAATTTGGTTAATTCACATGTTCC       | 12:20921805-20921828 |         |
| SLCO1B3P10A1 | TGCACATAATCTTTAATTTGATGG       | 12:20923872-20923896 | Exon 10 |
| SLCO1B3P10S1 | GAAATAAGAATGGGTGAATTTGG        | 12:20923526-20923548 |         |
| SLCO1B3P11A1 | TCTGTGATTTTGATTAAGGAGAGG       | 12:20925247-20925270 | Exon 11 |
| SLCO1B3P11S1 | TCTCCTTATCCCCTTGTCTCC          | 12:20924970-20924990 |         |

|                                                 |                              |                      |                                                                                          |
|-------------------------------------------------|------------------------------|----------------------|------------------------------------------------------------------------------------------|
| SLCO1B3P12A1                                    | TGAGCTCAAAATACAGAAAAATATGC   | 12:20927864-20927889 | Exon 12                                                                                  |
| SLCO1B3P12S1                                    | ATTCATAGCCCTGTTGTATTGG       | 12:20927559-20927581 |                                                                                          |
| SLCO1B3P13A1                                    | TCACAAAATAGAAATGATTCTTACC    | 12:20942809-20942833 | Exon 13                                                                                  |
| SLCO1B3P13S1                                    | GTATTCATTCTACCAGGGAGAGG      | 12:20942530-20942552 |                                                                                          |
| SLCO1B3P14A1                                    | CAAAGTAATTGTTCACTAAATGGTAGC  | 12:20945767-20945793 | Exon 14                                                                                  |
| SLCO1B3P14S1                                    | GATTCCTGGGTGGATGTAAGC        | 12:20945403-20945423 |                                                                                          |
| SLCO1B3P15A1                                    | ATGGGAGGTTGGAAGAAGATCC       | 12:20960951-20960972 | Exon 15                                                                                  |
| SLCO1B3P15S1                                    | TTCTTTCTTTAAGATATGCATACTGG   | 12:20960109-20960135 | Exon 15                                                                                  |
| <b>Copy number analysis by quantitative PCR</b> |                              |                      |                                                                                          |
| SLCO1B3_1_L                                     | TTAAAGACCCACATAAATGGAAAAA    | 12:20894106-20894130 | <i>SLCO1B3</i> intron 1                                                                  |
| SLCO1B3_1_R                                     | GCAGAGAAATCTGGGTAGCACT       | 12:20894176-20894197 |                                                                                          |
| SLCO1B3_2_L                                     | AGTTAGGCATAGTGGTGCACAG       | 12:20896533-20896554 | <i>SLCO1B3</i> intron 1                                                                  |
| SLCO1B3_2_R                                     | CTCTTGGGCTCTATCAATCCTC       | 12:20896588-20896609 |                                                                                          |
| SLCO1B3_3_L                                     | AAAAGCAAAATTTCTTATATCCCTGT   | 12:20930418-20930443 | <i>SLCO1B3</i> intron 11                                                                 |
| SLCO1B3_3_R                                     | TTCTACATATGGCATTGTTGGTAGA    | 12:20930467-20930491 |                                                                                          |
| SLCO1B3_4_L                                     | TCCTAGGAACAACAGGCACTC        | 12:20930615-20930635 | <i>SLCO1B3</i> intron 11                                                                 |
| SLCO1B3_4_R                                     | TCATGGGACCTCCTCAGTTT         | 12:20930677-20930696 |                                                                                          |
| SLCO1B3_5_L                                     | TGTAATTTGGACATGCAAGACA       | 12:20960410-20960431 | <i>SLCO1B3</i> exon 14                                                                   |
| SLCO1B3_5_R                                     | CATCTTAATGAATCAATGCAATGTTAG  | 12:20960445-20960471 |                                                                                          |
| SLCO1B1_1_L                                     | TCCATCATTCATATAGAACGGAGAT    | 12:21216917-21216941 | <i>SLCO1B1</i> exon 2                                                                    |
| SLCO1B1_1_R                                     | CAATTTCAAAGCTTCCGTCAA        | 12:21216972-21216992 |                                                                                          |
| SLCO1B1_2_L                                     | AGAGACGAGGTAGAGGCAAAAA       | 12:21221733-21221754 | <i>SLCO1B1</i> intron 4                                                                  |
| SLCO1B1_2_R                                     | GAATCTCCAGAAAGATTTACAAACG    | 12:21221791-21221815 |                                                                                          |
| SLCO1B1_3_L                                     | TGGATGAAGCAAACCTTAGAATCC     | 12:21283308-21283330 | <i>SLCO1B1</i> exon 14                                                                   |
| SLCO1B1_3_R                                     | TCCCCTTAACAATGTGTTTCACT      | 12:21283373-21283395 |                                                                                          |
| SLCO1B1_4_L                                     | TTTGCAATCAATGAAAATAAGAAGA    | 12:21296103-21296127 | Intergenic between<br><i>SLCO1B3</i> & <i>SLCO1B1</i>                                    |
| SLCO1B1_4_R                                     | GAGAGAGACTCGGTTAGTGAGACTG    | 12:21296222-21296246 |                                                                                          |
| SLCO1B1_5_L                                     | CTTCCCCTGTGCCTATGTCT         | 12:21302281-21302300 | Intergenic between<br><i>SLCO1B3</i> & <i>SLCO1B1</i>                                    |
| SLCO1B1_5_R                                     | CCAAAACCATAGAAACCCTCAA       | 12:21302325-21302346 |                                                                                          |
| SLCO1B1_6_L                                     | TTGTGCAACTGTTTCATAGTACTCTCTT | 12:21304533-21304559 | Intergenic – between<br><i>SLCO1B3</i> & <i>SLCO1B1</i>                                  |
| SLCO1B1_6_R                                     | AGCAGACTCAGATTGCTAAAATCA     | 12:21304618-21304641 |                                                                                          |
| <b>Fine resolution mapping of the deletions</b> |                              |                      |                                                                                          |
| LDEL_A_U                                        | TTGCCTCCACAAAGTTCTATT        | 12:20898799-20898819 | Regions surrounding<br>the large R2 deletion                                             |
| LDEL_D_L                                        | TAGTGCTGAAAGTTTGTAGCCA       | 12:21303755-21303775 |                                                                                          |
| LDEL_B_L                                        | ATTTTTCCTATACAAGTTGA         | 12:20899086-20899106 | Regions in the<br>deleted sequence                                                       |
| LDEL_C_U                                        | TGTCACTGCAAGCGAAGATT         | 12:21303145-21303165 |                                                                                          |
| ROTOR_934.4_L                                   | AATAGCCTGTTCCTGAACAAAT       | 12:20934470-20934490 | Regions surrounding<br>the deletion in<br><i>SLCO1B3</i> linked with<br>the R1 haplotype |
| ROTOR_926.8_U                                   | ACCACGCCTGGCCAATTCTTT        | 12:20926892-20926912 |                                                                                          |
